# Supplementary material for: EphB2 mediates social isolation-induced memory forgetting
Source: PubMed Central journal article supplement (PMC7653962; doi:10.1038/s41398-020-01051-6), 2020-11-09
Supplement: 41398_2020_1051_MOESM1_ESM.pdf [file 41398_2020_1051_MOESM1_ESM.pdf]

1 **EphB2 mediates social isolation induced memory forgetting**

2 Xin-Rong Wu<sup>1, 5</sup>, Yu Zhang<sup>2, 5</sup>, Xian-Dong Liu<sup>1,2</sup>, Wu-Bo Han<sup>1</sup>, Nan-Jie Xu<sup>2,3,4\*</sup>, Suya

3 Sun<sup>1\*</sup>

4

5 **Supplementary Figures and Tabela**

6

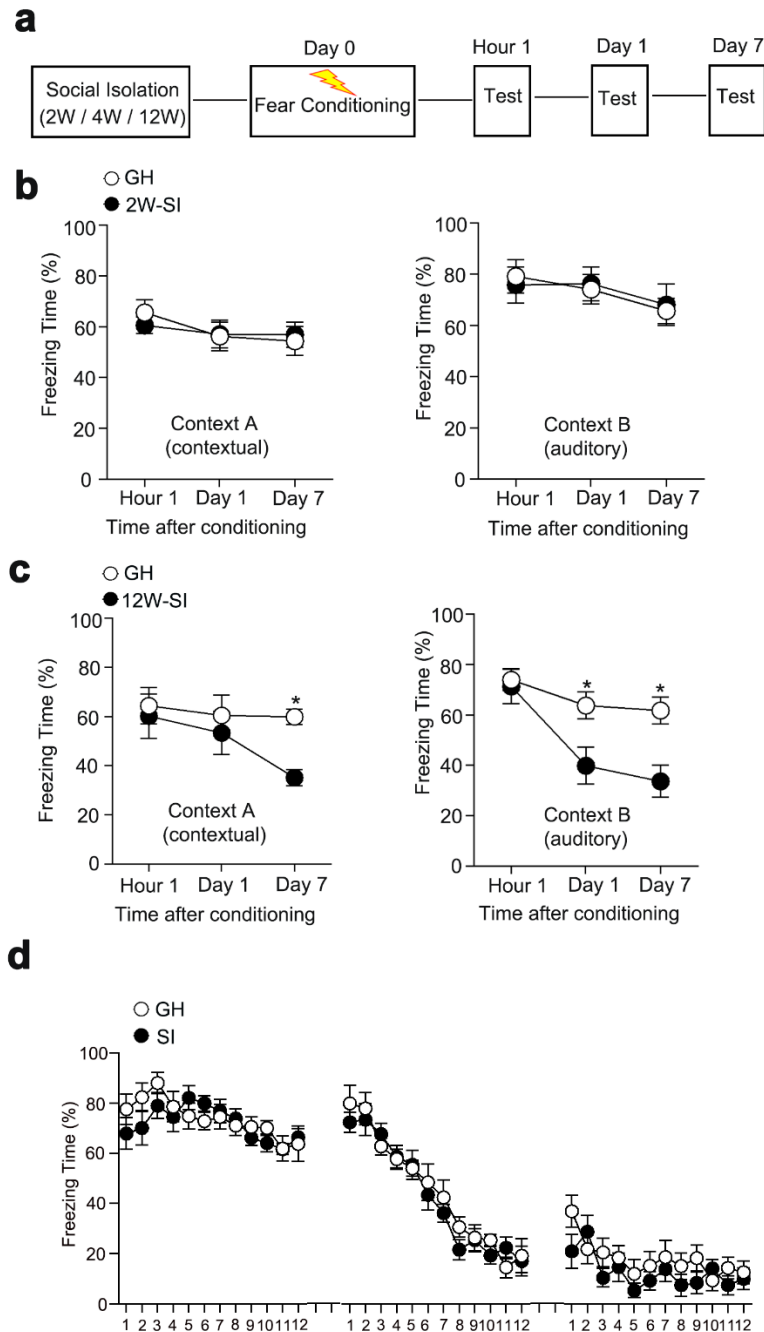

7

8 **Supplementary Fig. 1 SI induces the forgetting of long-term fear memory.**

9 **a** Experimental paradigm of memory process in fear conditioning. **b** No difference was

10 seen in short-term memory or long-term memory between GH mice and SI (2W) mice

---

11 in fear conditioning. GH,  $n = 12$  mice; SI,  $n = 12$  mice, two-way *ANOVA*, context A,  
12 effect of time,  $F_{(2, 66)} = 1.277$ ,  $p > 0.05$ ; effect of group,  $F_{(1, 66)} = 0.01826$ ,  $p > 0.05$ ;  
13 group  $\times$  time,  $F_{(2, 66)} = 0.3063$ ,  $p > 0.05$ ; context B, effect of time,  $F_{(2, 66)} = 1.428$ ,  $p >$   
14  $0.05$ ; effect of group,  $F_{(1, 66)} = 0.01826$ ,  $p > 0.05$ ; group  $\times$  time,  $F_{(2, 66)} = 0.1231$ ,  $p >$   
15  $0.05$ , Tukey post hoc analysis was performed. **c** Long-term memory was impaired in SI  
16 (12W) mice compared with GH mice. GH,  $n = 11$  mice; SI,  $n = 7$  mice, two-way *ANOVA*,  
17 context A, effect of time,  $F_{(2, 49)} = 2.134$ ,  $p > 0.05$ ; effect of group,  $F_{(1, 49)} = 4.163$ ,  $p <$   
18  $0.05$ ; group  $\times$  time,  $F_{(2, 49)} = 1.184$ ,  $p > 0.05$ , Tukey post hoc analysis was performed;  
19 context B, effect of time,  $F_{(2, 49)} = 10.2$ ,  $p < 0.001$ ; effect of group,  $F_{(1, 49)} = 14.19$ ,  $p <$   
20  $0.001$ ; group  $\times$  time,  $F_{(2, 49)} = 2.668$ ,  $p > 0.05$ ; Tukey post hoc analysis was performed.  
21 **d** No difference was seen in fear extinction between GH and SI mice. GH = 7 mice, SI  
22 = 7 mice, two-way *ANOVA*, effect of time,  $F_{(35, 432)} = 59.46$ ,  $p < 0.0001$ ; effect of group,  
23  $F_{(1, 432)} = 6.980$ ,  $p < 0.01$ ; group  $\times$  time,  $F_{(35, 432)} = 0.7259$ ,  $p > 0.05$ , Tukey post hoc  
24 analysis was performed. All data are presented as mean  $\pm$  SEM.  $*p < 0.05$ .

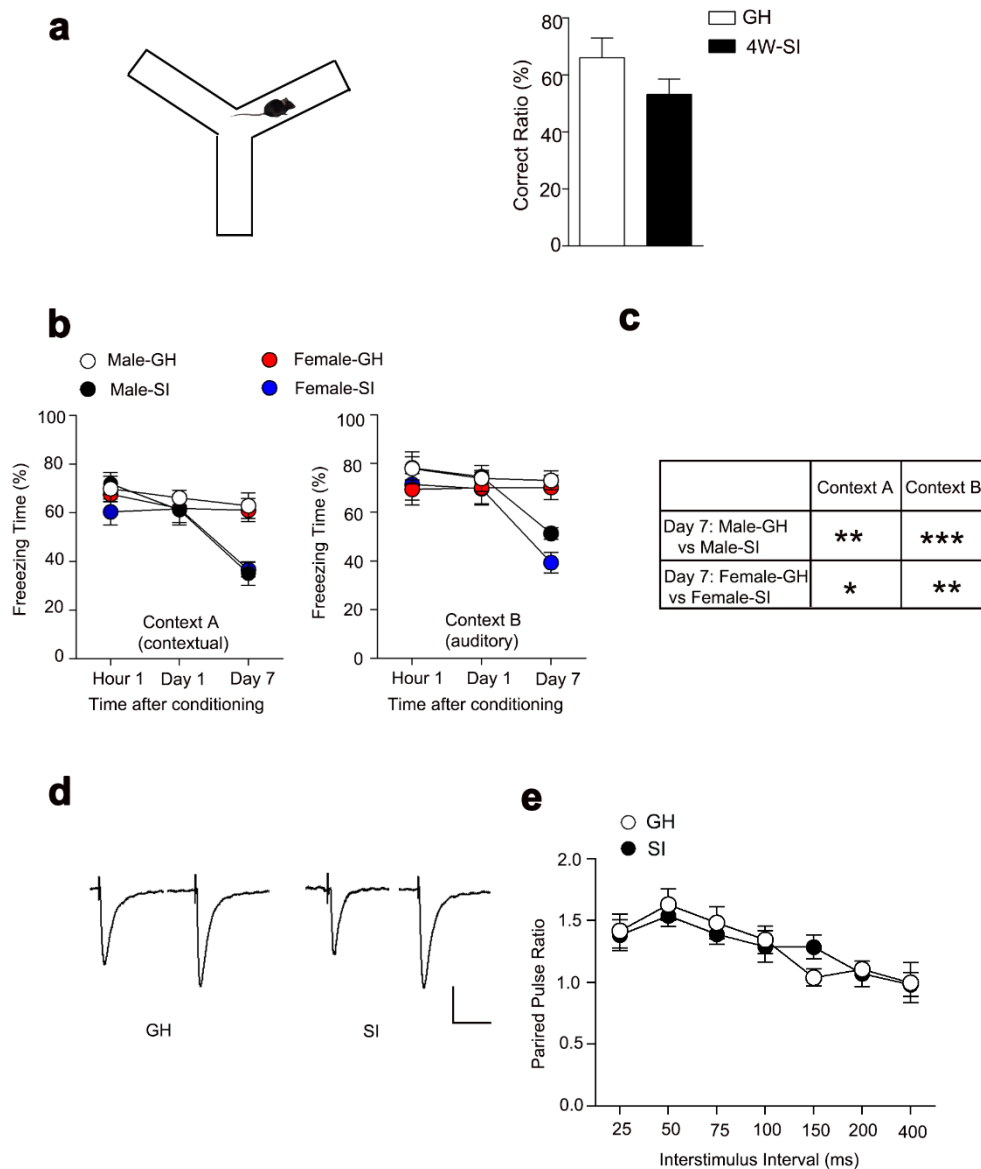

25

26 **Supplementary Fig. 2 SI do not affect the fear extinction and presynaptic**27 **function. a** No difference was seen in short-term memory or spatial memory between28 group housed mice and 4-week isolated mice in Y-maze. GH,  $n = 9$  mice; SI,  $n = 7$ 29 mice, unpaired Student's  $t$  test,  $t_{(14)} = 1.406$ ,  $p > 0.05$ . **b** No difference was seen30 between males and females on social isolation induced fear memory forgetting. **c** The31 list showed the statistical results. **d** Representative PPR trace at 100 ms interval .32 Calibration: 100 pA, 25 ms. **e** Quantification of PPR from GH and SI mice. GH,  $n =$

33 16 neurons from 4 mice; SI,  $n = 15$  neurons from 4 mice; two-way ANOVA; effect of  
34 interval time,  $F_{(6, 203)} = 7.292$ ,  $p < 0.0001$ ; effect of group,  $F_{(1, 203)} = 0.0322$ ,  $p > 0.05$ ;  
35 group  $\times$  interval time,  $F_{(6, 203)} = 0.5651$ ,  $p > 0.05$ , Tukey post hoc analysis was  
36 performed. All data are presented as mean  $\pm$ SEM. \* $p < 0.05$ ; \*\* $p < 0.01$ ; \*\*\* $p <$   
37 0.01.

38

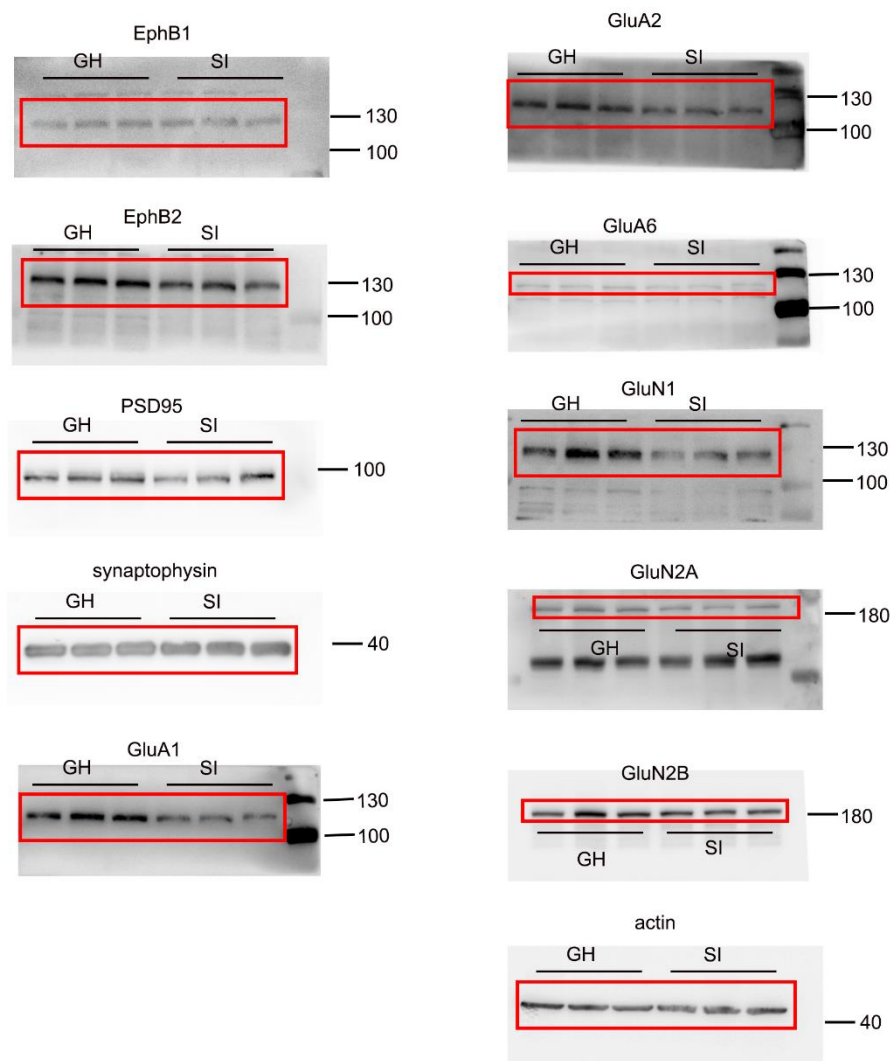

39

40 **Supplementary Fig. 3 Whole western blotting related to Fig. 2a.**

41

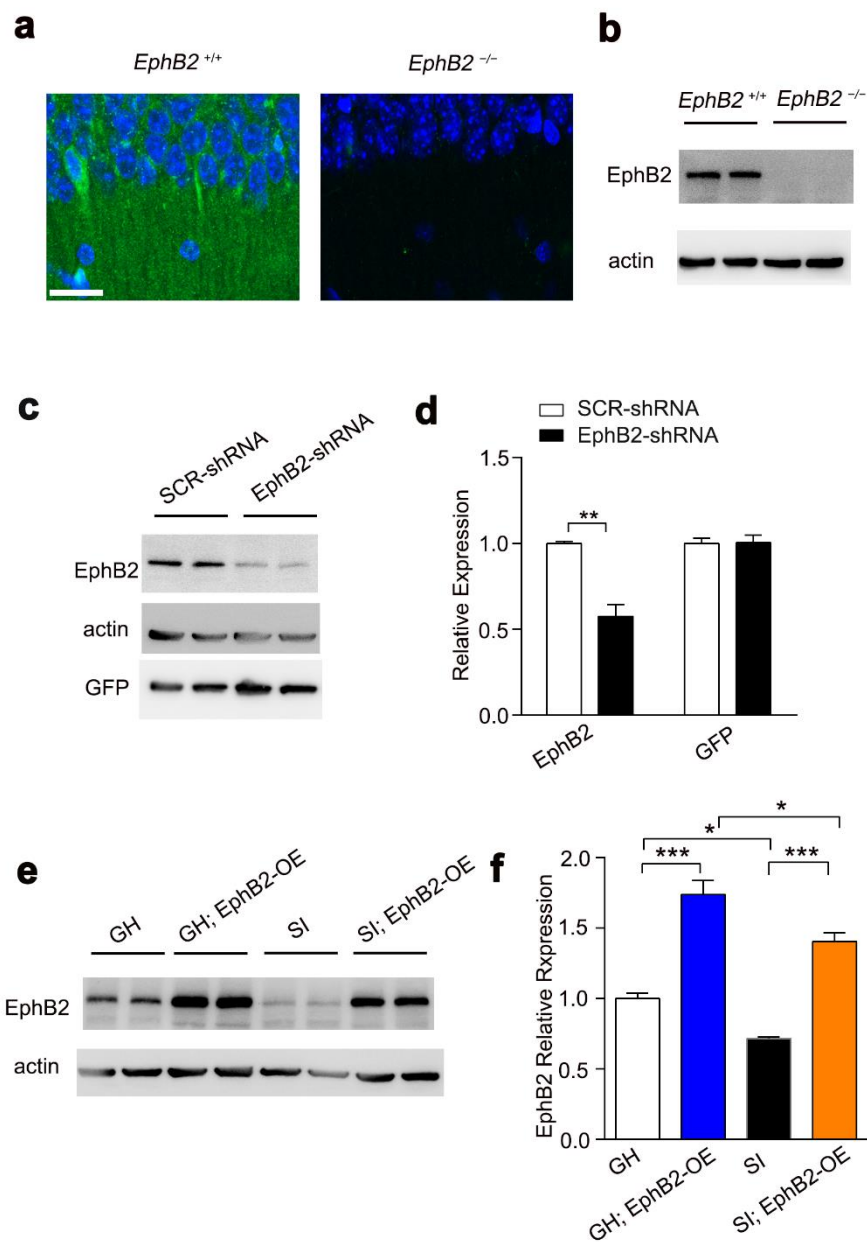

42

43 **Supplementary Fig. 4 Verification of EphB2 antibody and virus. a** Representative  
 44 confocal image of EphB2 staining in *EphB2*<sup>+/+</sup> and *EphB2*<sup>-/-</sup> mice. Scale bar: 25  $\mu$ m.  
 45 **b** Western blotting showed the EphB2 and actin from *EphB2*<sup>+/+</sup> and *EphB2*<sup>-/-</sup> mice. **c**  
 46 The expression of EphB2 in hippocampus CA1 region from SCR-shRNA and EphB2-  
 47 shRNA mice were detected by western blotting. **d** The quantification of EphB2, GFP

---

48 proteins in hippocampus.  $n = 3$  mice for each group, paired Student's  $t$  test, EphB2,  $t_{(2)}$   
49  $= 5.991$ ,  $p < 0.01$ ; GFP,  $t_{(2)} = 0.0706$ ,  $p > 0.05$ . **e** The expression of EphB2 in  
50 hippocampus from GH, GH with AAV-EphB2 (EphB2-OE), SI, SI with AAV-EphB2  
51 (EphB2-OE) mice was detected by western blotting. **f** The quantification of EphB2  
52 proteins in hippocampus.  $n = 3$  mice for each group, two-way ANOVA; effect of group,  
53  $F_{(1,8)} = 24.79$ ,  $p < 0.01$ ; effect of treatment,  $F_{(1,8)} = 132.1$ ,  $p < 0.0001$ ; group  $\times$  treatment,  
54  $F_{(1,8)} = 0.1529$ ,  $p > 0.05$ ; Tukey post hoc analysis was performed. All data are presented  
55 as mean  $\pm$  SEM. \* $p < 0.05$ ; \*\* $p < 0.01$ ; \*\*\* $p < 0.01$ .



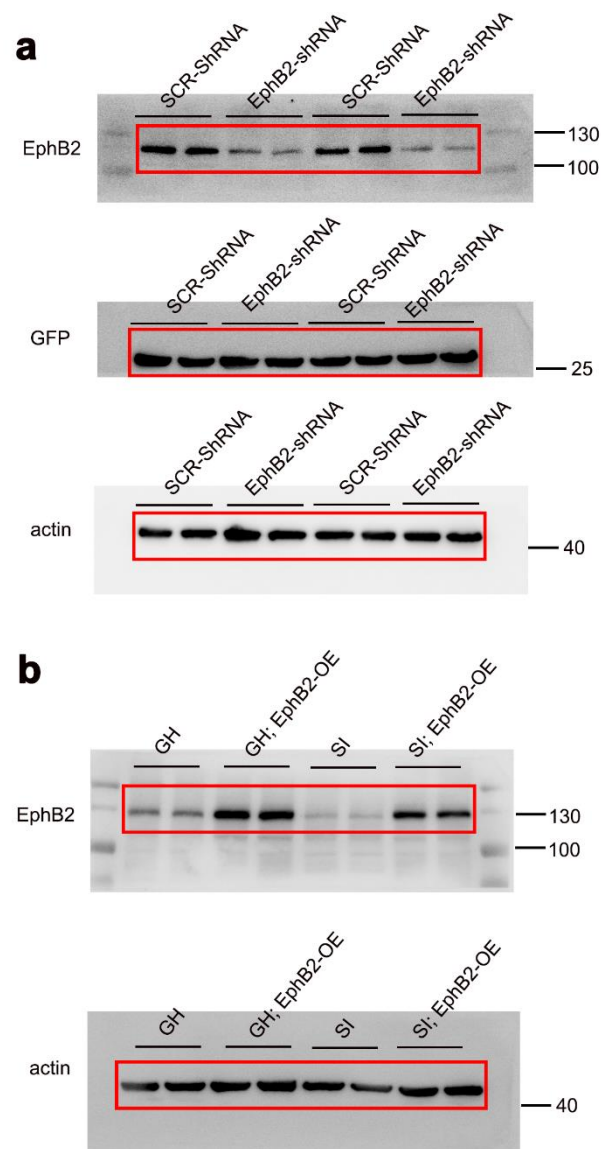

56

57 **Supplementary Fig. 5 Whole western blotting related to Supplementary Fig. 3c (a)**

58 **and 3e (b).**

59

60 **Supplementary Table 1. ANOVA results related to Fig. 3b**61 **Context A**

|        |             | <i>F</i>               | <i>P</i>   |
|--------|-------------|------------------------|------------|
| Hour 1 | group       | $F_{(1,27)} = 0.04483$ | $p > 0.05$ |
|        | treatment   | $F_{(1,27)} = 0.7798$  | $p > 0.05$ |
|        | interaction | $F_{(1,27)} = 0.1030$  | $p > 0.05$ |
| Day 1  | group       | $F_{(1,27)} = 0.7583$  | $p > 0.05$ |
|        | treatment   | $F_{(1,27)} = 0.2864$  | $p > 0.05$ |
|        | interaction | $F_{(1,27)} = 0.6971$  | $p > 0.05$ |
| Day 7  | group       | $F_{(1,27)} = 11.92$   | $p < 0.01$ |
|        | treatment   | $F_{(1,27)} = 6.012$   | $p < 0.05$ |
|        | interaction | $F_{(1,27)} = 1.054$   | $p > 0.05$ |

62 **Context B**

|        |             | <i>F</i>               | <i>P</i>   |
|--------|-------------|------------------------|------------|
| Hour 1 | group       | $F_{(1,27)} = 0.08326$ | $p > 0.05$ |
|        | treatment   | $F_{(1,27)} = 0.2988$  | $p > 0.05$ |
|        | interaction | $F_{(1,27)} = 0.08326$ | $p > 0.05$ |
| Day 1  | group       | $F_{(1,27)} = 1.352$   | $p > 0.05$ |
|        | treatment   | $F_{(1,27)} = 0.4632$  | $p > 0.05$ |
|        | interaction | $F_{(1,27)} = 0.02596$ | $p > 0.05$ |
| Day 7  | group       | $F_{(1,27)} = 9.527$   | $p < 0.01$ |
|        | treatment   | $F_{(1,27)} = 10.05$   | $p < 0.01$ |
|        | interaction | $F_{(1,27)} = 2.749$   | $p > 0.05$ |

64

65 **Supplementary Table 2. ANOVA results related to Fig. 3d**

|               |             | <i>F</i>                 | <i>P</i>    |
|---------------|-------------|--------------------------|-------------|
| Spine density | group       | $F_{(1,71)} = 1.56$      | $p > 0.05$  |
|               | treatment   | $F_{(1,71)} = 0.0005791$ | $p > 0.05$  |
|               | interaction | $F_{(1,71)} = 0.7928$    | $p > 0.05$  |
| Mushroom      | group       | $F_{(1,71)} = 1.55$      | $p > 0.05$  |
|               | treatment   | $F_{(1,71)} = 10.62$     | $p < 0.01$  |
|               | interaction | $F_{(1,71)} = 0.00514$   | $p > 0.05$  |
| Stubby        | group       | $F_{(1,71)} = 0.1221$    | $p > 0.05$  |
|               | treatment   | $F_{(1,71)} = 0.7599$    | $p > 0.05$  |
|               | interaction | $F_{(1,71)} = 4.668$     | $p < 0.05$  |
| Thin          | group       | $F_{(1,71)} = 14.33$     | $p < 0.001$ |
|               | treatment   | $F_{(1,71)} = 12$        | $p < 0.001$ |
|               | interaction | $F_{(1,71)} = 1.377$     | $p > 0.05$  |

66

67

68 **Supplementary Table 3. ANOVA results related to Fig. 3f**

|           |             | <i>F</i>               | <i>P</i>    |
|-----------|-------------|------------------------|-------------|
| Amplitude | group       | $F_{(1,59)} = 14.25$   | $p < 0.001$ |
|           | treatment   | $F_{(1,59)} = 14.36$   | $p < 0.001$ |
|           | interaction | $F_{(1,59)} = 3.168$   | $p > 0.05$  |
| Frequency | group       | $F_{(1,59)} = 1.071$   | $p > 0.05$  |
|           | treatment   | $F_{(1,59)} = 0.09728$ | $p > 0.05$  |
|           | treatment   | $F_{(1,59)} = 1.28$    | $p > 0.05$  |

69

70 **Supplementary Table 4. ANOVA results related to Fig. 3h**

|             |             | <i>F</i>                 | <i>P</i>    |
|-------------|-------------|--------------------------|-------------|
| fEPSP slope | group       | $F_{(3,319)} = 34.55$    | $p < 0.001$ |
|             | treatment   | $F_{(10,319)} = 0.01840$ | $p > 0.05$  |
|             | interaction | $F_{(30,319)} = 0.02592$ | $p > 0.05$  |

71

72

73 **Supplementary Table 5. ANOVA results related to Fig. 4a**74 **Context A**

|        |             | <i>F</i>                | <i>P</i>   |
|--------|-------------|-------------------------|------------|
| Hour 1 | group       | $F_{(1,29)} = 0.034$    | $p > 0.05$ |
|        | treatment   | $F_{(1,29)} = 0.04654$  | $p > 0.05$ |
|        | interaction | $F_{(1,29)} = 0.0001$   | $p > 0.05$ |
| Day 1  | group       | $F_{(1,29)} = 1.07$     | $p > 0.05$ |
|        | treatment   | $F_{(1,29)} = 1.249$    | $p > 0.05$ |
|        | interaction | $F_{(1,29)} = 0.001656$ | $p > 0.05$ |
| Day 7  | group       | $F_{(1,29)} = 5.374$    | $p < 0.05$ |
|        | treatment   | $F_{(1,29)} = 6.836$    | $p < 0.05$ |
|        | interaction | $F_{(1,29)} = 1.892$    | $p > 0.05$ |

75 **Context B**

|        |             | <i>F</i>               | <i>P</i>   |
|--------|-------------|------------------------|------------|
| Hour 1 | group       | $F_{(1,29)} = 0.08513$ | $p > 0.05$ |
|        | treatment   | $F_{(1,29)} = 0.01505$ | $p > 0.05$ |
|        | interaction | $F_{(1,29)} = 0.3495$  | $p > 0.05$ |
| Day 1  | group       | $F_{(1,29)} = 0.3818$  | $p > 0.05$ |
|        | treatment   | $F_{(1,29)} = 0.1331$  | $p > 0.05$ |
|        | interaction | $F_{(1,29)} = 0.06949$ | $p > 0.05$ |
| Day 7  | group       | $F_{(1,29)} = 10.73$   | $p < 0.01$ |
|        | treatment   | $F_{(1,29)} = 11.77$   | $p < 0.01$ |
|        | interaction | $F_{(1,29)} = 5.916$   | $p < 0.05$ |

77 **Supplementary Table 6. ANOVA results related to Fig. 4c**

|               |             | <i>F</i>                | <i>P</i>   |
|---------------|-------------|-------------------------|------------|
| Spine density | group       | $F_{(1,63)} = 5.565$    | $p < 0.05$ |
|               | treatment   | $F_{(1,63)} = 0.3292$   | $p > 0.05$ |
|               | interaction | $F_{(1,63)} = 0.1663$   | $p > 0.05$ |
| Mushroom      | group       | $F_{(1,63)} = 0.3757$   | $p > 0.05$ |
|               | treatment   | $F_{(1,63)} = 0.05802$  | $p > 0.05$ |
|               | interaction | $F_{(1,63)} = 4.972$    | $p < 0.05$ |
| Stubby        | group       | $F_{(1,63)} = 2.05$     | $p > 0.05$ |
|               | treatment   | $F_{(1,63)} = 1.447$    | $p > 0.05$ |
|               | interaction | $F_{(1,63)} = 0.005215$ | $p > 0.05$ |
| Thin          | group       | $F_{(1,63)} = 5.578$    | $p < 0.05$ |
|               | treatment   | $F_{(1,63)} = 3.164$    | $p > 0.05$ |
|               | interaction | $F_{(1,63)} = 8.956$    | $p < 0.01$ |

78

79

80

81 **Supplementary Table 7. ANOVA results related to Fig. 4e**

|           |             | <i>F</i>              | <i>P</i>   |
|-----------|-------------|-----------------------|------------|
| Amplitude | group       | $F_{(1,66)} = 4.876$  | $p < 0.05$ |
|           | treatment   | $F_{(1,66)} = 8.257$  | $p < 0.01$ |
|           | interaction | $F_{(1,66)} = 6.486$  | $p < 0.05$ |
| Frequency | group       | $F_{(1,66)} = 0.4383$ | $p > 0.05$ |
|           | treatment   | $F_{(1,66)} = 0.6536$ | $p > 0.05$ |
|           | treatment   | $F_{(1,66)} = 2.266$  | $p > 0.05$ |

82

83 **Supplementary Table 8. ANOVA results related to Fig. 4g**

|             |             | <i>F</i>                | <i>P</i>     |
|-------------|-------------|-------------------------|--------------|
| fEPSP slope | group       | $F_{(3,330)} = 77.8$    | $p < 0.0001$ |
|             | treatment   | $F_{(10,330)} = 0.2552$ | $p > 0.05$   |
|             | interaction | $F_{(30,330)} = 0.2882$ | $p > 0.05$   |

84
